# Supplementary material
Source: publisher site journal article supplement (https://www.dovepress.com/article/478156)
Supplement: Supplementary file 1 [file get_supplementary_file.php]

**Supplementary**

**Table 1 Sequences of the PCR primers**

| **Gene** | **Primer sequences**  **(5’-3’)** | **Product**  **（bp）** |
| --- | --- | --- |
| *RmpA* | F: ACTGGGCTACCTCTGCTTCA | 516 |
|  | R: CTTGCATGAGCCATCTTTCA |  |
| *rmpA2* | F: CTTTATGTGCAATAAGGATGTT | 451 |
|  | R: CCTCCTGGAGAGTAAGCATT |  |
| *iucA* | F: AATCAATGGCTATTCCCGCTG | 239 |
|  | R: CGCTTCACTTCTTTCACTGACAGG |  |
| *iroB* | F：ATCTCATCATCTACCCTCCGCTC | 235 |
|  | R：GGTTCGCCGTCGTTTTCAA |  |
| *peg-344* | F：CTTGAAACTATCCCTCCAGTC | 508 |
|  | R：CCAGCGAAAGAATAACCCC |  |
| *iutA* | F: ACCTGGGTTATCGAAAACGC | 1115 |
|  | R: GATGTCATAGCCTGATTGC |  |
| *magA* | F: GGTGCTCTTTACATCATTGC | 1283 |
|  | R: GCAATGGCCATTTGCGTTAG |  |
| *aerobactin* | F: GCATAGGCGGATACGAACAT | 556 |
|  | R: CACAGGGCAATTGCTTACCT |  |
| *ybtS* | F: GACGGAAACAGCACGGTAAA | 242 |
|  | R: GAGCATAATAAGGCGAAAGA |  |
| *alls* | F: CATTACGCACCTTTGTCAGC | 764 |
|  | R: GAATGTGTCGGCGATCAGCTT |  |
| *mrkD* | F: CCACCAACTATTCCCTCGAA | 226 |
|  | R: ATGGAACCCACATCGACATT |  |
| *fimH* | F: ATGAACGCCTGGTCCTTTGC | 688 |
|  | R: GCTGAACGCCTATCCCCTGC |  |
| *kfu* | F: GAAGTGACGCTGTTTCTGGC | 797 |
|  | R: TTTCGTGTGGCCAGTGACTC |  |
| *entB* | F: GTCAACTGGGCCTTTGAGCCGGTC | 400 |
|  | R: TATGGGCGTAAACGCCGGTGAT |  |
| *wabG* | F: ACCATCGGCCATTTGATAGA | 683 |
|  | R: CGGACTGGCAGATCCATATC |  |
| K1 | F: GGTGCTCTTTACATCATTGC | 1283 |
|  | R: GCCCAGGTTAATGAATCCGT |  |
| K2 | F: GACCCGATATTCATACTTGACAGAG | 641 |
|  | R: CCTGAAGTAAAATCGTAAATAGAT |  |
| K5 | F: GCCACCTCTAAGCATATAGC | 540 |
|  | R: CGCACCAGTAATTCCAACAG |  |
| K20 | F: CGGTGCTACAGTGCATCATT | 741 |
|  | R: GTTATACGATGCTCAGTCGC |  |
| K54 | F: CATTAGCTCAGTGGTTGGCT | 881 |
|  | R: GCTTGACAAACACCATAGCAG |  |
| K57 | F: CGACAAATCTCTCCTGACGA | 1037 |
|  | R: CGCGACAAACATAACACTCG |  |
| *gapA* | F: TGAAATATGACTCCACTCACGG | 662 |
|  | R: CTTCAGAAGCGGCTTTGATGGCTT |  |
| *infB* | F: CTCGCTGCTGGACTATATTCG | 462 |
|  | R: CGCTTTCAGCTCAAGAACTTC |  |
| *rpoB* | F: GGCGAAATGGCWGAGAACCA | 1075 |
|  | R: GAGTCTTCGAAGTTGTAACC |  |
| *mdh* | F: CCCAACTCGCTTCAGGTTCAG | 756 |
|  | R: CCGTTTTTCCCCAGCAGCAG |  |
| *pgi* | F: GAGAAAAACCTGCCTGTACTGCTGGC | 566 |
|  | R: CGCGCCACGCTTTATAGCGGTTAAT |  |
| *phoE* | F: ACCTACCGCAACACCGACTTCTTCGG | 602 |
|  | R: TGATCAGAACTGGTAGGTGAT |  |
| *tonB* | F: CTTTATACCTCGGTACATCAGGTT | 414 |
|  | R: ATTCGCCGGCTGRGCRGAGAG |  |
| blaKPC | F: GCTACACCTAGCTCCACCTTC | 989 |
|  | R: ACAGTGGTTGGTA ATCCATGC |  |
| blaNDM | F: CTTCCAACGGTTTGATCGTC | 271 |
|  | R: ATTGGCATAAGTCGCAATCC |  |
| blaOXA | F: GATCGGATTGGAGAACCAGA | 501 |
|  | R: ATTTCTGACCGCATTTCCAT |  |
| blaIMP | F: CTACCGCAGCAGAGTCTTTG | 587 |
|  | R: AACCAGTTTTGCCTTACCAT |  |
| blaVIM | F: ATGTTCAAACTTTTGAGTAAG | 801 |
|  | R: CTACTCAACGACTGAGCG |  |
